# Supplementary material for: Increased prevalence of hepatitis C virus subtype 6a in China: a comparison between 2004–2007 and 2008–2011
Source: PubMed Central journal article supplement (PMC4221604; doi:10.1007/s00705-014-2185-1), 2014-08-02

Supplemental Figure 1

1a

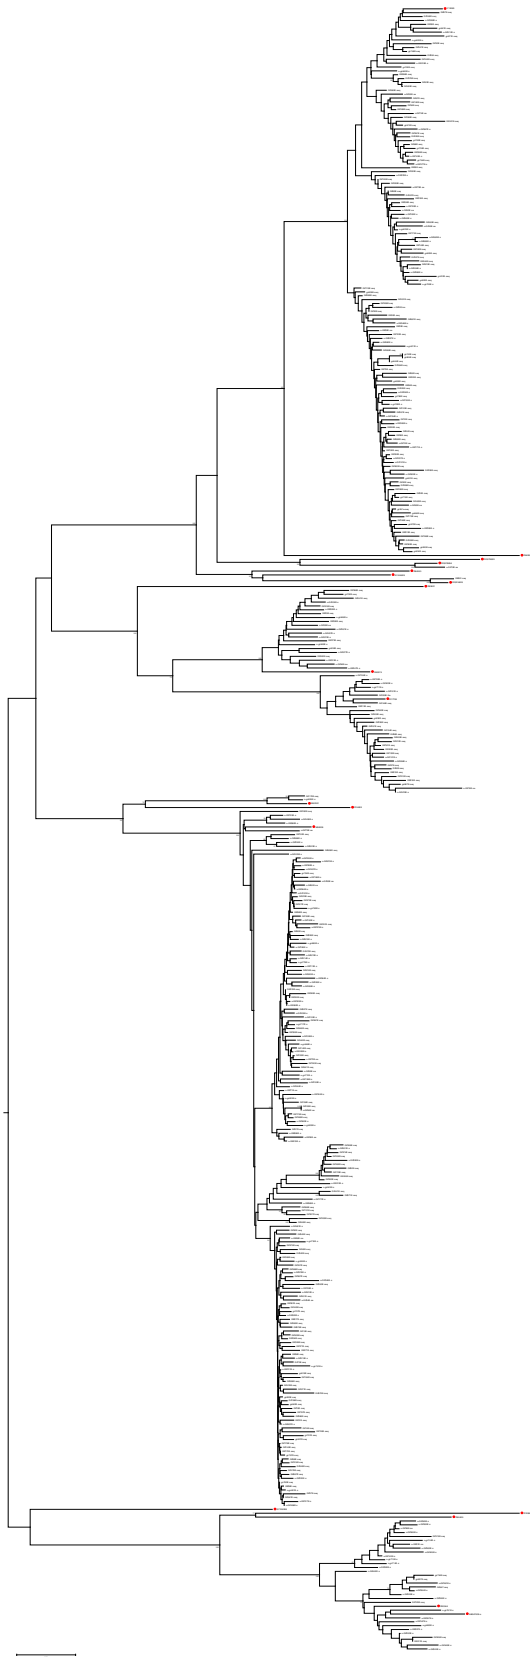

1b

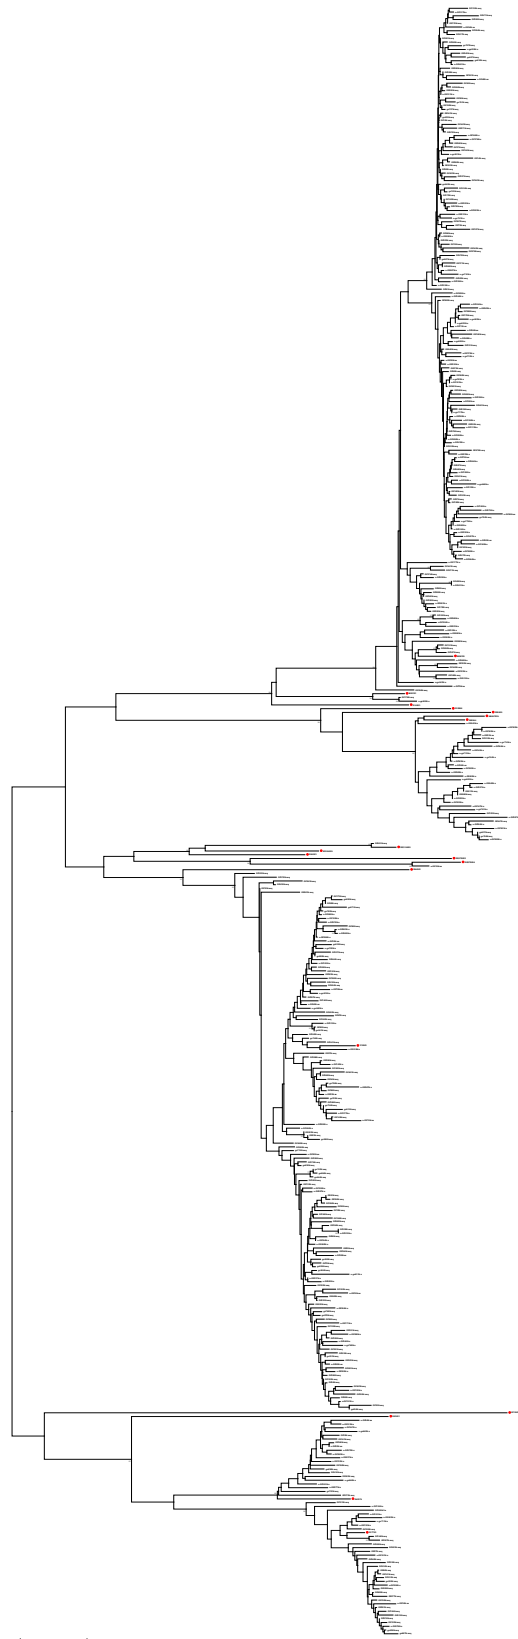

Supplement: 705_2014_2185_MOESM3_ESM.pdf [file 705_2014_2185_MOESM3_ESM.pdf]
